# Supplementary material for: Impact of in situ polymer coating on particle dispersion into solid laser-generated nanocomposites
Source: Royal Society of Chemistry journal article supplement (doi:10.1039/c0cp02262d), 2011-01-01
Supplement: c0cp02262d.pdf [file c0cp02262d.pdf]

## Supporting information

### Impact of in situ polymer coating on particle dispersion into solid laser-generated nanocomposites

*Philipp Wagener<sup>1,†</sup>, Gudrun Brandes<sup>2,†</sup>, Andreas Schwenke<sup>1</sup>, and Stephan Barcikowski<sup>1,\*</sup>*

1: Laser Zentrum Hannover e. V., Hollerithallee 8, D-30419 Hannover, Germany

2: Institute of Cell Biology and Electron Microscopy, Medical School Hannover, Carl-Neuberg-Str. 1, D-30625 Hannover, Germany

\* To whom correspondence should be addressed: s.barcikowski@lzh.de

†These authors equally contributed to this work

Nanoparticle productivity and subsequent nanoparticle concentration is directly linked to the amount of laser-ablated mass. Therefore, we measured the amount of ablated mass after a fixed time interval for polyurethane (TPU) concentrations up to 3 wt%. As no precipitation or of redeposition of laser-generated nanoparticles could be observed, the ablated mass is directly proportional to the nanoparticle concentration.. As can be seen in figure S1 there is just a slight decrease in ablation rate up to a TPU concentration of 0.5 wt%. Therefore, nanoparticle concentration in all analysed samples is comparable and should not effect analyzed parameters like interparticle distance significantly.

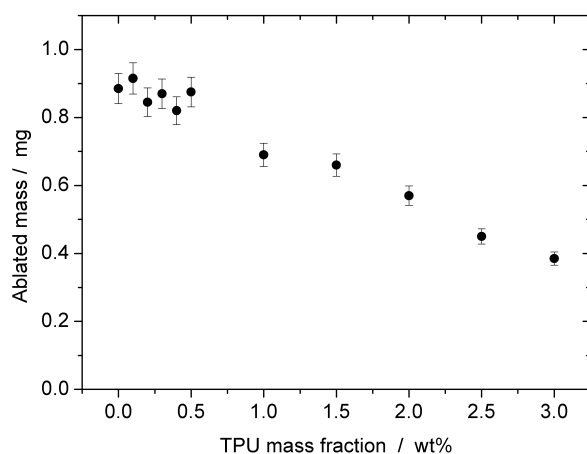

Fig. S1: Total ablated mass of silver in TPU-doped THF at different TPU-concentration (laser ablation time 10 min)
